# Supplementary material
Source: publisher site journal article supplement (https://static.cambridge.org/content/id/urn:cambridge.org:id:article:S0007114520001804/resource/name/S0007114520001804supp001.docx)
Supplement: Supplementary file 1 [file S0007114520001804supp001.docx]

| **Table S1.** Pairwise Chi-Square and Unadjusted Logistic Regression Associations Between Eating Behaviors (*N* = 3,060) | | | | | | | | | | | | | | | | |
| --- | --- | --- | --- | --- | --- | --- | --- | --- | --- | --- | --- | --- | --- | --- | --- | --- |
|  |  | |  | Breakfast | | |  | Green vegetables/fruit | | | |  | Fast food | | |  |
|  | **Eating behavior** | |  | **χ2 (1,1)** | **OR** | **95% CI** |  | **χ2 (1,1)** | | **OR** | **95% CI** |  | **χ2 (1,1)** | **OR** | **95% CI** |  |
|  |  | |  |  |  |  |  |  | |  |  |  |  |  |  |  |
|  | Breakfasta | |  | --- | --- | --- |  | --- | | --- | --- |  | --- | --- | --- |  |
|  | Green vegetables/fruitb | |  | 8.02** | 1.27 | 1.08, 1.50 |  | --- | | --- | --- |  | --- | --- | --- |  |
|  | Fast foodc | |  | 30.14*** | .65 | .56, .76 |  | 22.99*** | | .67 | .56, .79 |  | --- | --- | --- |  |
|  | Sweetened drinksd | |  | 7.86** | .80 | .68, .93 |  | 12.12*** | | .74 | .63, .88 |  | 124.15*** | 2.48 | 2.11, 2.91 |  |
|  |  |  | |  | | | | |  | | | | | | | |
|  |  | |  |  |  |  |  |  | |  |  |  |  |  |  |  |  |  |  |  |
| CI—95% confidence interval, OR—odds ratio. | | | | | | | | | | | | | | | | |
| aOdds of consuming breakfast ≥ 4 days (versus < 4 days) during the school week. | | | | | | | | | | | | | | | | |
| bOdds of consuming fruits or green vegetables 7 days (versus < 7 days) weekly. | | | | | | | | | | | | | | | | |
| cOdds of consuming fast food ≥ 2 days (versus < 2 days) weekly. | | | | | | | | | | | | | | | | |
| dOdds of consuming ≥ 2 sweetened drinks (versus < 2) daily. | | | | | | | | | | | | | | | | |
| ***p* < .01. ****p* < .001. | | | | | | | | | | | | | | | | |
